# Supplementary material
Source: publisher site journal article supplement (https://www.spandidos-publications.com/7329/downloadSupplementary)
Supplement: Supplementary file 1 [file downloadSupplementary]

## Sheet: Table S11
Table SXI. Gene set variation analysis of notable pathways.
	logFC	AveExpr	t	P.Value	adj.P.Val	B	pathway	group
KEGG_ARACHIDONIC_ACID_METABOLISM	-0.189341	-0.0863102	-11.6481	6.3e-28	1.17e-25	52.6201	KEGG_ARACHIDONIC_ACID_METABOLISM	down
KEGG_CYTOSOLIC_DNA_SENSING_PATHWAY	-0.15818	-0.192599	-10.108	5.43e-22	5.05e-20	39.1909	KEGG_CYTOSOLIC_DNA_SENSING_PATHWAY	down
KEGG_SYSTEMIC_LUPUS_ERYTHEMATOSUS	-0.09048	-0.447201	-9.85886	4.41e-21	2.74e-19	37.1334	KEGG_SYSTEMIC_LUPUS_ERYTHEMATOSUS	down
KEGG_ALLOGRAFT_REJECTION	-0.0455853	-0.768099	-9.1552	1.36e-18	6.33e-17	31.5125	KEGG_ALLOGRAFT_REJECTION	down
KEGG_LEISHMANIA_INFECTION	-0.0922699	-0.547666	-9.07296	2.61e-18	9.71e-17	30.8747	KEGG_LEISHMANIA_INFECTION	down
KEGG_PROTEASOME	-0.187528	-0.33057	-8.94297	7.24e-18	2.24e-16	29.8749	KEGG_PROTEASOME	down
KEGG_HEMATOPOIETIC_CELL_LINEAGE	-0.208649	-0.200718	-8.68205	5.44e-17	1.45e-15	27.8999	KEGG_HEMATOPOIETIC_CELL_LINEAGE	down
KEGG_TYPE_I_DIABETES_MELLITUS	-0.0397439	-0.754294	-8.53832	1.62e-16	3.77e-15	26.8303	KEGG_TYPE_I_DIABETES_MELLITUS	down
KEGG_INTESTINAL_IMMUNE_NETWORK_FOR_IGA_PRODUCTION	-0.0803243	-0.614049	-8.51651	1.91e-16	3.95e-15	26.6692	KEGG_INTESTINAL_IMMUNE_NETWORK_FOR_IGA_PRODUCTION	down
KEGG_AUTOIMMUNE_THYROID_DISEASE	-0.0447737	-0.712737	-8.30738	9.13e-16	1.7e-14	25.1397	KEGG_AUTOIMMUNE_THYROID_DISEASE	down
KEGG_PRIMARY_IMMUNODEFICIENCY	-0.196322	-0.314168	-8.23799	1.52e-15	2.58e-14	24.6387	KEGG_PRIMARY_IMMUNODEFICIENCY	down
KEGG_COMPLEMENT_AND_COAGULATION_CASCADES	-0.136929	-0.26921	-8.09509	4.34e-15	6.72e-14	23.6167	KEGG_COMPLEMENT_AND_COAGULATION_CASCADES	down
KEGG_CYTOKINE_CYTOKINE_RECEPTOR_INTERACTION	-0.184742	-0.145619	-8.05697	5.72e-15	8.18e-14	23.3464	KEGG_CYTOKINE_CYTOKINE_RECEPTOR_INTERACTION	down
KEGG_PROPANOATE_METABOLISM	0.267283	-0.0883261	7.92837	1.44e-14	1.92e-13	22.4418	KEGG_PROPANOATE_METABOLISM	up
KEGG_CELL_ADHESION_MOLECULES_CAMS	-0.0878185	-0.487154	-7.76399	4.64e-14	5.75e-13	21.3021	KEGG_CELL_ADHESION_MOLECULES_CAMS	down
KEGG_LEUKOCYTE_TRANSENDOTHELIAL_MIGRATION	-0.17492	-0.0632673	-7.47887	3.36e-13	3.91e-12	19.3698	KEGG_LEUKOCYTE_TRANSENDOTHELIAL_MIGRATION	down
KEGG_ASTHMA	-0.0409736	-0.738078	-7.40322	5.63e-13	5.82e-12	18.8668	KEGG_ASTHMA	down
KEGG_VIRAL_MYOCARDITIS	-0.0501988	-0.63307	-7.40308	5.64e-13	5.82e-12	18.8658	KEGG_VIRAL_MYOCARDITIS	down
KEGG_CHEMOKINE_SIGNALING_PATHWAY	-0.151781	-0.133245	-6.8472	2.2e-11	2.09e-10	15.2973	KEGG_CHEMOKINE_SIGNALING_PATHWAY	down
KEGG_PRION_DISEASES	-0.120653	-0.170012	-6.84423	2.24e-11	2.09e-10	15.2788	KEGG_PRION_DISEASES	down
KEGG_TOLL_LIKE_RECEPTOR_SIGNALING_PATHWAY	-0.136912	-0.146489	-6.73969	4.36e-11	3.86e-10	14.6335	KEGG_TOLL_LIKE_RECEPTOR_SIGNALING_PATHWAY	down
KEGG_VALINE_LEUCINE_AND_ISOLEUCINE_DEGRADATION	0.232232	-0.0704223	6.67484	6.55e-11	5.54e-10	14.2374	KEGG_VALINE_LEUCINE_AND_ISOLEUCINE_DEGRADATION	up
KEGG_ETHER_LIPID_METABOLISM	-0.11096	-0.0958546	-6.61414	9.57e-11	7.74e-10	13.8695	KEGG_ETHER_LIPID_METABOLISM	down
KEGG_NEUROACTIVE_LIGAND_RECEPTOR_INTERACTION	-0.101407	-0.0828104	-6.55865	1.35e-10	1.05e-09	13.5357	KEGG_NEUROACTIVE_LIGAND_RECEPTOR_INTERACTION	down
KEGG_LYSINE_DEGRADATION	0.184145	-0.141982	6.24984	8.77e-10	6.52e-09	11.7213	KEGG_LYSINE_DEGRADATION	up
KEGG_BUTANOATE_METABOLISM	0.189157	-0.066659	6.18473	1.29e-09	9.22e-09	11.3484	KEGG_BUTANOATE_METABOLISM	up
KEGG_CITRATE_CYCLE_TCA_CYCLE	0.22404	-0.0670635	6.15476	1.54e-09	1.06e-08	11.1778	KEGG_CITRATE_CYCLE_TCA_CYCLE	up
KEGG_RIG_I_LIKE_RECEPTOR_SIGNALING_PATHWAY	-0.106566	-0.157681	-6.10619	2.04e-09	1.35e-08	10.9029	KEGG_RIG_I_LIKE_RECEPTOR_SIGNALING_PATHWAY	down
KEGG_NOD_LIKE_RECEPTOR_SIGNALING_PATHWAY	-0.133336	-0.175337	-6.10087	2.11e-09	1.35e-08	10.8728	KEGG_NOD_LIKE_RECEPTOR_SIGNALING_PATHWAY	down
KEGG_JAK_STAT_SIGNALING_PATHWAY	-0.134253	-0.0473607	-5.99561	3.87e-09	2.4e-08	10.284	KEGG_JAK_STAT_SIGNALING_PATHWAY	down
KEGG_LINOLEIC_ACID_METABOLISM	-0.103475	-0.0637167	-5.91493	6.14e-09	3.68e-08	9.83856	KEGG_LINOLEIC_ACID_METABOLISM	down
KEGG_GLYCOSPHINGOLIPID_BIOSYNTHESIS_GANGLIO_SERIES	-0.114197	-0.239337	-5.83834	9.46e-09	5.5e-08	9.42062	KEGG_GLYCOSPHINGOLIPID_BIOSYNTHESIS_GANGLIO_SERIES	down
KEGG_LIMONENE_AND_PINENE_DEGRADATION	0.219344	-0.0470363	5.6359	2.9e-08	1.64e-07	8.33886	KEGG_LIMONENE_AND_PINENE_DEGRADATION	up
KEGG_PATHOGENIC_ESCHERICHIA_COLI_INFECTION	-0.121105	-0.199458	-5.58713	3.79e-08	2.07e-07	8.08328	KEGG_PATHOGENIC_ESCHERICHIA_COLI_INFECTION	down
KEGG_ALANINE_ASPARTATE_AND_GLUTAMATE_METABOLISM	0.111431	-0.0635522	5.47269	7e-08	3.72e-07	7.49124	KEGG_ALANINE_ASPARTATE_AND_GLUTAMATE_METABOLISM	up
KEGG_SULFUR_METABOLISM	-0.119926	-0.0279413	-5.43285	8.65e-08	4.47e-07	7.28769	KEGG_SULFUR_METABOLISM	down
KEGG_AMYOTROPHIC_LATERAL_SCLEROSIS_ALS	-0.0882502	-0.21721	-5.38287	1.13e-07	5.66e-07	7.03417	KEGG_AMYOTROPHIC_LATERAL_SCLEROSIS_ALS	down
KEGG_ALPHA_LINOLENIC_ACID_METABOLISM	-0.0994652	-0.088253	-5.37479	1.18e-07	5.75e-07	6.99336	KEGG_ALPHA_LINOLENIC_ACID_METABOLISM	down
KEGG_ASCORBATE_AND_ALDARATE_METABOLISM	0.103408	-0.0898705	5.34404	1.38e-07	6.58e-07	6.83863	KEGG_ASCORBATE_AND_ALDARATE_METABOLISM	up
KEGG_FC_EPSILON_RI_SIGNALING_PATHWAY	-0.0921583	-0.155034	-5.292	1.81e-07	8.41e-07	6.57863	KEGG_FC_EPSILON_RI_SIGNALING_PATHWAY	down
KEGG_T_CELL_RECEPTOR_SIGNALING_PATHWAY	-0.117391	-0.139767	-5.23991	2.37e-07	1.07e-06	6.32062	KEGG_T_CELL_RECEPTOR_SIGNALING_PATHWAY	down
KEGG_RENIN_ANGIOTENSIN_SYSTEM	-0.138485	-0.023802	-5.09955	4.83e-07	2.14e-06	5.63679	KEGG_RENIN_ANGIOTENSIN_SYSTEM	down
KEGG_STARCH_AND_SUCROSE_METABOLISM	0.0727804	-0.104989	5.0911	5.04e-07	2.18e-06	5.59614	KEGG_STARCH_AND_SUCROSE_METABOLISM	up
KEGG_FC_GAMMA_R_MEDIATED_PHAGOCYTOSIS	-0.118865	-0.0692966	-5.07381	5.5e-07	2.32e-06	5.51318	KEGG_FC_GAMMA_R_MEDIATED_PHAGOCYTOSIS	down
KEGG_B_CELL_RECEPTOR_SIGNALING_PATHWAY	-0.114598	-0.124472	-4.98265	8.64e-07	3.57e-06	5.08004	KEGG_B_CELL_RECEPTOR_SIGNALING_PATHWAY	down
KEGG_FATTY_ACID_METABOLISM	0.13643	-0.0333653	4.7178	3.09e-06	1.25e-05	3.86205	KEGG_FATTY_ACID_METABOLISM	up
KEGG_NATURAL_KILLER_CELL_MEDIATED_CYTOTOXICITY	-0.0171502	-0.703316	-4.54625	6.85e-06	2.71e-05	3.1056	KEGG_NATURAL_KILLER_CELL_MEDIATED_CYTOTOXICITY	down
KEGG_GLYCOSAMINOGLYCAN_BIOSYNTHESIS_KERATAN_SULFATE	-0.132288	-0.0305349	-4.3872	1.4e-05	5.42e-05	2.42735	KEGG_GLYCOSAMINOGLYCAN_BIOSYNTHESIS_KERATAN_SULFATE	down
KEGG_ARGININE_AND_PROLINE_METABOLISM	0.0851876	-0.0767819	4.25752	2.47e-05	9.36e-05	1.89091	KEGG_ARGININE_AND_PROLINE_METABOLISM	up
KEGG_BASAL_CELL_CARCINOMA	-0.0891463	-0.0829182	-4.22323	2.86e-05	0.000106346	1.75155	KEGG_BASAL_CELL_CARCINOMA	down
KEGG_NICOTINATE_AND_NICOTINAMIDE_METABOLISM	0.0810755	-0.0401568	4.16313	3.69e-05	0.000133524	1.50983	KEGG_NICOTINATE_AND_NICOTINAMIDE_METABOLISM	up
KEGG_PYRUVATE_METABOLISM	0.0973718	-0.137377	4.16059	3.73e-05	0.000133524	1.49971	KEGG_PYRUVATE_METABOLISM	up
KEGG_CYSTEINE_AND_METHIONINE_METABOLISM	0.082203	-0.0925497	4.12019	4.43e-05	0.000155332	1.33911	KEGG_CYSTEINE_AND_METHIONINE_METABOLISM	up
KEGG_TERPENOID_BACKBONE_BIOSYNTHESIS	0.144791	-0.0248896	4.06724	5.52e-05	0.00019017	1.13091	KEGG_TERPENOID_BACKBONE_BIOSYNTHESIS	up
KEGG_NITROGEN_METABOLISM	0.0742126	-0.0831899	4.0328	6.37e-05	0.000215313	0.996805	KEGG_NITROGEN_METABOLISM	up
KEGG_TAURINE_AND_HYPOTAURINE_METABOLISM	-0.0898606	-0.114293	-4.01595	6.82e-05	0.000226649	0.931613	KEGG_TAURINE_AND_HYPOTAURINE_METABOLISM	down
KEGG_RIBOSOME	-0.147417	-0.178931	-3.98062	7.89e-05	0.000257319	0.795707	KEGG_RIBOSOME	down
KEGG_VALINE_LEUCINE_AND_ISOLEUCINE_BIOSYNTHESIS	0.058001	-0.533572	3.94969	8.94e-05	0.000286761	0.677654	KEGG_VALINE_LEUCINE_AND_ISOLEUCINE_BIOSYNTHESIS	up
KEGG_NOTCH_SIGNALING_PATHWAY	-0.0835783	-0.209226	-3.93705	9.41e-05	0.000296702	0.629627	KEGG_NOTCH_SIGNALING_PATHWAY	down
KEGG_GLYCOLYSIS_GLUCONEOGENESIS	0.0748179	-0.115193	3.82312	0.000148296	0.000459718	0.20359	KEGG_GLYCOLYSIS_GLUCONEOGENESIS	up
KEGG_GRAFT_VERSUS_HOST_DISEASE	-0.00877141	-0.875178	-3.74275	0.00020301	0.000619014	-0.0898906	KEGG_GRAFT_VERSUS_HOST_DISEASE	down
KEGG_VEGF_SIGNALING_PATHWAY	-0.071	-0.0826309	-3.68306	0.0002554	0.000766201	-0.304005	KEGG_VEGF_SIGNALING_PATHWAY	down
KEGG_HISTIDINE_METABOLISM	-0.0602834	-0.0753704	-3.66122	0.000277568	0.000819486	-0.381537	KEGG_HISTIDINE_METABOLISM	down
KEGG_BASE_EXCISION_REPAIR	-0.114214	-0.0198453	-3.58029	0.000376503	0.00109421	-0.665071	KEGG_BASE_EXCISION_REPAIR	down
KEGG_AMINOACYL_TRNA_BIOSYNTHESIS	0.0928891	-0.269955	3.51694	0.000476057	0.00136225	-0.882764	KEGG_AMINOACYL_TRNA_BIOSYNTHESIS	up
KEGG_GLYCOSAMINOGLYCAN_BIOSYNTHESIS_CHONDROITIN_SULFATE	-0.0976309	-0.0759549	-3.40061	0.000725828	0.00204552	-1.27293	KEGG_GLYCOSAMINOGLYCAN_BIOSYNTHESIS_CHONDROITIN_SULFATE	down
KEGG_APOPTOSIS	-0.0761588	-0.137982	-3.32023	0.000964714	0.00267816	-1.53518	KEGG_APOPTOSIS	down
KEGG_GLYCOSYLPHOSPHATIDYLINOSITOL_GPI_ANCHOR_BIOSYNTHESIS	0.120439	-0.0559908	3.25594	0.00120634	0.0032997	-1.74063	KEGG_GLYCOSYLPHOSPHATIDYLINOSITOL_GPI_ANCHOR_BIOSYNTHESIS	up
KEGG_GLYCOSAMINOGLYCAN_BIOSYNTHESIS_HEPARAN_SULFATE	-0.0786915	-0.0719004	-3.1972	0.00147497	0.00397602	-1.92496	KEGG_GLYCOSAMINOGLYCAN_BIOSYNTHESIS_HEPARAN_SULFATE	down
KEGG_ARRHYTHMOGENIC_RIGHT_VENTRICULAR_CARDIOMYOPATHY_ARVC	-0.0719027	-0.0626861	-3.19156	0.00150349	0.00399498	-1.94249	KEGG_ARRHYTHMOGENIC_RIGHT_VENTRICULAR_CARDIOMYOPATHY_ARVC	down
KEGG_GLUTATHIONE_METABOLISM	-0.0661388	-0.0788169	-3.17164	0.00160835	0.00421343	-2.00419	KEGG_GLUTATHIONE_METABOLISM	down
KEGG_GLYCOSPHINGOLIPID_BIOSYNTHESIS_GLOBO_SERIES	-0.0803086	-0.0284532	-3.04664	0.00243565	0.00623595	-2.38273	KEGG_GLYCOSPHINGOLIPID_BIOSYNTHESIS_GLOBO_SERIES	down
KEGG_BETA_ALANINE_METABOLISM	0.0861968	-0.0396437	3.04516	0.00244744	0.00623595	-2.38713	KEGG_BETA_ALANINE_METABOLISM	up
KEGG_CALCIUM_SIGNALING_PATHWAY	-0.0496738	-0.0580125	-3.03183	0.00255613	0.00642486	-2.42663	KEGG_CALCIUM_SIGNALING_PATHWAY	down
KEGG_P53_SIGNALING_PATHWAY	-0.0823003	-0.0474805	-3.0061	0.0027784	0.00680223	-2.50236	KEGG_P53_SIGNALING_PATHWAY	down
KEGG_GLYCEROPHOSPHOLIPID_METABOLISM	-0.0454755	-0.23052	-3.00599	0.00277941	0.00680223	-2.50269	KEGG_GLYCEROPHOSPHOLIPID_METABOLISM	down
KEGG_PYRIMIDINE_METABOLISM	-0.0721584	-0.111466	-2.99778	0.00285401	0.00689411	-2.52673	KEGG_PYRIMIDINE_METABOLISM	down
KEGG_STEROID_BIOSYNTHESIS	-0.0731116	-0.128938	-2.95441	0.00327936	0.00782	-2.65263	KEGG_STEROID_BIOSYNTHESIS	down
KEGG_DILATED_CARDIOMYOPATHY	-0.051561	-0.138837	-2.92162	0.0036387	0.00856707	-2.74668	KEGG_DILATED_CARDIOMYOPATHY	down
KEGG_HYPERTROPHIC_CARDIOMYOPATHY_HCM	-0.0527635	-0.129783	-2.85381	0.00449796	0.0104578	-2.93792	KEGG_HYPERTROPHIC_CARDIOMYOPATHY_HCM	down
KEGG_MAPK_SIGNALING_PATHWAY	-0.0479503	-0.161466	-2.7985	0.00533097	0.0122415	-3.09066	KEGG_MAPK_SIGNALING_PATHWAY	down
KEGG_GLYCOSAMINOGLYCAN_DEGRADATION	-0.0750936	-0.0302454	-2.76044	0.00598304	0.0135713	-3.1941	KEGG_GLYCOSAMINOGLYCAN_DEGRADATION	down
KEGG_DRUG_METABOLISM_OTHER_ENZYMES	-0.0332505	-0.0969666	-2.75317	0.0061154	0.0137044	-3.21369	KEGG_DRUG_METABOLISM_OTHER_ENZYMES	down
KEGG_ABC_TRANSPORTERS	-0.039197	-0.314112	-2.72474	0.00665929	0.0147456	-3.28989	KEGG_ABC_TRANSPORTERS	down
KEGG_REGULATION_OF_ACTIN_CYTOSKELETON	-0.0641381	-0.0509717	-2.71737	0.00680706	0.0148955	-3.30949	KEGG_REGULATION_OF_ACTIN_CYTOSKELETON	down
KEGG_NON_HOMOLOGOUS_END_JOINING	0.0970404	-0.022145	2.695	0.00727434	0.0157329	-3.36874	KEGG_NON_HOMOLOGOUS_END_JOINING	up
KEGG_SELENOAMINO_ACID_METABOLISM	0.081896	-0.0277934	2.68172	0.00756513	0.0160484	-3.40368	KEGG_SELENOAMINO_ACID_METABOLISM	up
KEGG_MTOR_SIGNALING_PATHWAY	0.072476	-0.0615417	2.68048	0.0075928	0.0160484	-3.40693	KEGG_MTOR_SIGNALING_PATHWAY	up
KEGG_DNA_REPLICATION	-0.0915849	-0.0462844	-2.57082	0.0104321	0.021802	-3.68893	KEGG_DNA_REPLICATION	down
KEGG_LYSOSOME	-0.0612061	-0.148673	-2.55376	0.0109505	0.0226184	-3.73178	KEGG_LYSOSOME	down
KEGG_PURINE_METABOLISM	-0.0465883	-0.119087	-2.55005	0.011066	0.0226184	-3.74105	KEGG_PURINE_METABOLISM	down
KEGG_ECM_RECEPTOR_INTERACTION	-0.0537445	-0.230322	-2.52774	0.0117851	0.0238263	-3.79659	KEGG_ECM_RECEPTOR_INTERACTION	down
KEGG_GLYOXYLATE_AND_DICARBOXYLATE_METABOLISM	0.0780509	-0.0351787	2.48542	0.0132635	0.0265269	-3.90058	KEGG_GLYOXYLATE_AND_DICARBOXYLATE_METABOLISM	up
KEGG_PROTEIN_EXPORT	0.100351	-0.0280888	2.47985	0.0134699	0.0266533	-3.91415	KEGG_PROTEIN_EXPORT	up
KEGG_MELANOGENESIS	-0.042403	-0.0866128	-2.40542	0.0165136	0.032332	-4.09253	KEGG_MELANOGENESIS	down
KEGG_PROXIMAL_TUBULE_BICARBONATE_RECLAMATION	0.0372939	-0.145039	2.3154	0.0209925	0.0406729	-4.3012	KEGG_PROXIMAL_TUBULE_BICARBONATE_RECLAMATION	up
KEGG_AXON_GUIDANCE	-0.056051	-0.0616696	-2.27677	0.0232187	0.0445225	-4.38833	KEGG_AXON_GUIDANCE	down
KEGG_PATHWAYS_IN_CANCER	-0.051215	-0.0595982	-2.27194	0.0235116	0.0446113	-4.39915	KEGG_PATHWAYS_IN_CANCER	down
KEGG_CIRCADIAN_RHYTHM_MAMMAL	0.079845	-0.0258279	2.26812	0.0237447	0.0446113	-4.40765	KEGG_CIRCADIAN_RHYTHM_MAMMAL	up
KEGG_TYPE_II_DIABETES_MELLITUS	0.0349737	-0.215907	2.2476	0.025034	0.0465633	-4.4532	KEGG_TYPE_II_DIABETES_MELLITUS	up
KEGG_ADIPOCYTOKINE_SIGNALING_PATHWAY	0.0378484	-0.245012	2.23226	0.026037	0.0479493	-4.48697	KEGG_ADIPOCYTOKINE_SIGNALING_PATHWAY	up
KEGG_EPITHELIAL_CELL_SIGNALING_IN_HELICOBACTER_PYLORI_INFECTION	-0.0480698	-0.149616	-2.19977	0.028277	0.0515639	-4.55776	KEGG_EPITHELIAL_CELL_SIGNALING_IN_HELICOBACTER_PYLORI_INFECTION	no
KEGG_RNA_POLYMERASE	-0.0529712	-0.261793	-2.18494	0.0293535	0.0530073	-4.58974	KEGG_RNA_POLYMERASE	no
KEGG_ENDOCYTOSIS	-0.037485	-0.293905	-2.11188	0.035189	0.0629342	-4.74417	KEGG_ENDOCYTOSIS	no
KEGG_VASCULAR_SMOOTH_MUSCLE_CONTRACTION	-0.0427414	-0.0734944	-2.10288	0.0359725	0.0637227	-4.76284	KEGG_VASCULAR_SMOOTH_MUSCLE_CONTRACTION	no
KEGG_GNRH_SIGNALING_PATHWAY	-0.0432329	-0.0760645	-2.09542	0.0366331	0.0642807	-4.77825	KEGG_GNRH_SIGNALING_PATHWAY	no
KEGG_PRIMARY_BILE_ACID_BIOSYNTHESIS	0.0455659	-0.101944	2.08841	0.0372628	0.0647745	-4.79268	KEGG_PRIMARY_BILE_ACID_BIOSYNTHESIS	no
KEGG_REGULATION_OF_AUTOPHAGY	0.0479875	0.0107576	2.08457	0.0376117	0.0647757	-4.80056	KEGG_REGULATION_OF_AUTOPHAGY	no
KEGG_SPLICEOSOME	-0.0492535	-0.268528	-2.06135	0.0397825	0.0678858	-4.84795	KEGG_SPLICEOSOME	no
KEGG_RIBOFLAVIN_METABOLISM	0.0540837	-0.0295534	2.02709	0.0431802	0.0730138	-4.91692	KEGG_RIBOFLAVIN_METABOLISM	no
KEGG_METABOLISM_OF_XENOBIOTICS_BY_CYTOCHROME_P450	-0.030822	-0.0590918	-1.99972	0.0460678	0.0766442	-4.9712	KEGG_METABOLISM_OF_XENOBIOTICS_BY_CYTOCHROME_P450	no
KEGG_GLYCINE_SERINE_AND_THREONINE_METABOLISM	0.0494112	-0.0730428	1.99895	0.0461513	0.0766442	-4.97271	KEGG_GLYCINE_SERINE_AND_THREONINE_METABOLISM	no
KEGG_TRYPTOPHAN_METABOLISM	0.0402433	-0.0650162	1.98511	0.047675	0.0784739	-4.99987	KEGG_TRYPTOPHAN_METABOLISM	no
KEGG_ONE_CARBON_POOL_BY_FOLATE	0.0489245	-0.178032	1.97153	0.0492109	0.0801718	-5.02634	KEGG_ONE_CARBON_POOL_BY_FOLATE	no
KEGG_ACUTE_MYELOID_LEUKEMIA	-0.0542177	-0.0553644	-1.96842	0.0495686	0.0801718	-5.03238	KEGG_ACUTE_MYELOID_LEUKEMIA	no
KEGG_TASTE_TRANSDUCTION	0.012259	-0.373498	1.85172	0.0646514	0.103665	-5.25209	KEGG_TASTE_TRANSDUCTION	no
KEGG_BASAL_TRANSCRIPTION_FACTORS	0.0407957	-0.254127	1.7952	0.0732226	0.116405	-5.35376	KEGG_BASAL_TRANSCRIPTION_FACTORS	no
KEGG_LONG_TERM_DEPRESSION	-0.0304883	-0.0909754	-1.77099	0.0771681	0.121638	-5.39635	KEGG_LONG_TERM_DEPRESSION	no
KEGG_INSULIN_SIGNALING_PATHWAY	0.0385559	-0.144502	1.76228	0.0786287	0.122899	-5.41152	KEGG_INSULIN_SIGNALING_PATHWAY	no
KEGG_PARKINSONS_DISEASE	0.0477405	-0.158637	1.75283	0.0802405	0.124373	-5.42792	KEGG_PARKINSONS_DISEASE	no
KEGG_OXIDATIVE_PHOSPHORYLATION	0.0468291	-0.1904	1.68564	0.0924842	0.142166	-5.54193	KEGG_OXIDATIVE_PHOSPHORYLATION	no
KEGG_PORPHYRIN_AND_CHLOROPHYLL_METABOLISM	0.0319717	-0.0890007	1.67974	0.0936292	0.142746	-5.55175	KEGG_PORPHYRIN_AND_CHLOROPHYLL_METABOLISM	no
KEGG_FOLATE_BIOSYNTHESIS	-0.0449534	-0.0248948	-1.65689	0.0981643	0.148444	-5.58938	KEGG_FOLATE_BIOSYNTHESIS	no
KEGG_VASOPRESSIN_REGULATED_WATER_REABSORPTION	0.0434221	-0.0897579	1.60359	0.109433	0.164149	-5.67521	KEGG_VASOPRESSIN_REGULATED_WATER_REABSORPTION	no
KEGG_TYROSINE_METABOLISM	-0.0246021	-0.088888	-1.52141	0.128785	0.191632	-5.80208	KEGG_TYROSINE_METABOLISM	no
KEGG_TGF_BETA_SIGNALING_PATHWAY	0.032211	-0.129745	1.47604	0.140558	0.20749	-5.86929	KEGG_TGF_BETA_SIGNALING_PATHWAY	no
KEGG_BLADDER_CANCER	-0.0364315	-0.0769768	-1.46549	0.143412	0.210036	-5.88464	KEGG_BLADDER_CANCER	no
KEGG_VIBRIO_CHOLERAE_INFECTION	0.0264906	-0.208312	1.43883	0.15082	0.21916	-5.92291	KEGG_VIBRIO_CHOLERAE_INFECTION	no
KEGG_LONG_TERM_POTENTIATION	0.0318273	-0.0825469	1.40716	0.159999	0.230696	-5.96749	KEGG_LONG_TERM_POTENTIATION	no
KEGG_FOCAL_ADHESION	-0.0308728	-0.112901	-1.34006	0.180832	0.258729	-6.05866	KEGG_FOCAL_ADHESION	no
KEGG_INOSITOL_PHOSPHATE_METABOLISM	0.035752	-0.0759916	1.31123	0.190376	0.270306	-6.09647	KEGG_INOSITOL_PHOSPHATE_METABOLISM	no
KEGG_MATURITY_ONSET_DIABETES_OF_THE_YOUNG	-0.0269647	-0.090189	-1.25476	0.210148	0.296118	-6.16817	KEGG_MATURITY_ONSET_DIABETES_OF_THE_YOUNG	no
KEGG_HOMOLOGOUS_RECOMBINATION	-0.0352039	-0.091736	-1.23809	0.216262	0.302441	-6.18875	KEGG_HOMOLOGOUS_RECOMBINATION	no
KEGG_FRUCTOSE_AND_MANNOSE_METABOLISM	0.0300212	-0.0609067	1.22475	0.221242	0.307098	-6.205	KEGG_FRUCTOSE_AND_MANNOSE_METABOLISM	no
KEGG_PHENYLALANINE_METABOLISM	-0.0227901	-0.101335	-1.18081	0.238237	0.328238	-6.25733	KEGG_PHENYLALANINE_METABOLISM	no
KEGG_PROSTATE_CANCER	0.0305568	-0.0688953	1.16399	0.244979	0.335045	-6.27685	KEGG_PROSTATE_CANCER	no
KEGG_CELL_CYCLE	-0.0321012	-0.0592283	-1.13173	0.258287	0.350667	-6.31353	KEGG_CELL_CYCLE	no
KEGG_PENTOSE_AND_GLUCURONATE_INTERCONVERSIONS	0.0192461	-0.0729649	1.09709	0.273126	0.368126	-6.35176	KEGG_PENTOSE_AND_GLUCURONATE_INTERCONVERSIONS	no
KEGG_ENDOMETRIAL_CANCER	0.0288512	-0.0743797	0.963412	0.335804	0.449349	-6.48822	KEGG_ENDOMETRIAL_CANCER	no
KEGG_NEUROTROPHIN_SIGNALING_PATHWAY	-0.0256323	-0.0582496	-0.916272	0.359963	0.478236	-6.53213	KEGG_NEUROTROPHIN_SIGNALING_PATHWAY	no
KEGG_GLYCOSPHINGOLIPID_BIOSYNTHESIS_LACTO_AND_NEOLACTO_SERIES	-0.0182844	-0.105914	-0.906794	0.36495	0.479674	-6.5407	KEGG_GLYCOSPHINGOLIPID_BIOSYNTHESIS_LACTO_AND_NEOLACTO_SERIES	no
KEGG_ERBB_SIGNALING_PATHWAY	0.0251349	-0.0463609	0.904425	0.366203	0.479674	-6.54282	KEGG_ERBB_SIGNALING_PATHWAY	no
KEGG_ALDOSTERONE_REGULATED_SODIUM_REABSORPTION	-0.0165637	-0.0256468	-0.844369	0.398865	0.515477	-6.59489	KEGG_ALDOSTERONE_REGULATED_SODIUM_REABSORPTION	no
KEGG_THYROID_CANCER	-0.0211518	-0.183158	-0.843984	0.399079	0.515477	-6.59521	KEGG_THYROID_CANCER	no
KEGG_HUNTINGTONS_DISEASE	0.017934	-0.143412	0.74954	0.453882	0.582221	-6.66983	KEGG_HUNTINGTONS_DISEASE	no
KEGG_RNA_DEGRADATION	0.0157947	-0.278818	0.688429	0.4915	0.622953	-6.71341	KEGG_RNA_DEGRADATION	no
KEGG_GALACTOSE_METABOLISM	-0.0155419	-0.110766	-0.687103	0.492334	0.622953	-6.71432	KEGG_GALACTOSE_METABOLISM	no
KEGG_SNARE_INTERACTIONS_IN_VESICULAR_TRANSPORT	-0.0208668	-0.026207	-0.675227	0.499841	0.628179	-6.72234	KEGG_SNARE_INTERACTIONS_IN_VESICULAR_TRANSPORT	no
KEGG_BIOSYNTHESIS_OF_UNSATURATED_FATTY_ACIDS	0.0175255	-0.0751155	0.656642	0.511712	0.638662	-6.73462	KEGG_BIOSYNTHESIS_OF_UNSATURATED_FATTY_ACIDS	no
KEGG_UBIQUITIN_MEDIATED_PROTEOLYSIS	0.0210328	-0.0423369	0.651455	0.51505	0.638662	-6.73799	KEGG_UBIQUITIN_MEDIATED_PROTEOLYSIS	no
KEGG_RENAL_CELL_CARCINOMA	0.0188187	-0.0484973	0.643011	0.52051	0.641157	-6.74341	KEGG_RENAL_CELL_CARCINOMA	no
KEGG_PEROXISOME	0.0161566	-0.120444	0.633052	0.526987	0.644866	-6.74971	KEGG_PEROXISOME	no
KEGG_PANTOTHENATE_AND_COA_BIOSYNTHESIS	0.0144322	-0.0864478	0.620428	0.535257	0.650705	-6.75756	KEGG_PANTOTHENATE_AND_COA_BIOSYNTHESIS	no
KEGG_N_GLYCAN_BIOSYNTHESIS	0.0203966	-0.0443912	0.603243	0.546619	0.660202	-6.76799	KEGG_N_GLYCAN_BIOSYNTHESIS	no
KEGG_NUCLEOTIDE_EXCISION_REPAIR	-0.0154722	-0.195947	-0.584828	0.558926	0.670711	-6.77885	KEGG_NUCLEOTIDE_EXCISION_REPAIR	no
KEGG_STEROID_HORMONE_BIOSYNTHESIS	-0.00602028	-0.21542	-0.566446	0.571343	0.681217	-6.78935	KEGG_STEROID_HORMONE_BIOSYNTHESIS	no
KEGG_PPAR_SIGNALING_PATHWAY	0.00866073	-0.10961	0.532622	0.59453	0.704348	-6.80779	KEGG_PPAR_SIGNALING_PATHWAY	no
KEGG_RETINOL_METABOLISM	0.00639035	-0.0767355	0.508964	0.611	0.719279	-6.82002	KEGG_RETINOL_METABOLISM	no
KEGG_SPHINGOLIPID_METABOLISM	-0.00946299	-0.244201	-0.492301	0.622721	0.728202	-6.8283	KEGG_SPHINGOLIPID_METABOLISM	no
KEGG_HEDGEHOG_SIGNALING_PATHWAY	-0.00939641	-0.100377	-0.487084	0.626411	0.728202	-6.83083	KEGG_HEDGEHOG_SIGNALING_PATHWAY	no
KEGG_ADHERENS_JUNCTION	-0.0133665	-0.122883	-0.47113	0.637752	0.736782	-6.83842	KEGG_ADHERENS_JUNCTION	no
KEGG_GLIOMA	-0.0111385	-0.0795706	-0.441815	0.658813	0.753415	-6.8517	KEGG_GLIOMA	no
KEGG_ANTIGEN_PROCESSING_AND_PRESENTATION	-0.0009955	-0.844817	-0.439828	0.66025	0.753415	-6.85257	KEGG_ANTIGEN_PROCESSING_AND_PRESENTATION	no
KEGG_WNT_SIGNALING_PATHWAY	-0.00865669	-0.11653	-0.410179	0.681849	0.769212	-6.86508	KEGG_WNT_SIGNALING_PATHWAY	no
KEGG_PENTOSE_PHOSPHATE_PATHWAY	0.0108709	-0.065766	0.409475	0.682366	0.769212	-6.86537	KEGG_PENTOSE_PHOSPHATE_PATHWAY	no
KEGG_MISMATCH_REPAIR	0.0134517	-0.0558711	0.378863	0.70495	0.789883	-6.87734	KEGG_MISMATCH_REPAIR	no
KEGG_PHOSPHATIDYLINOSITOL_SIGNALING_SYSTEM	-0.00804965	-0.0813886	-0.319688	0.749338	0.834592	-6.89786	KEGG_PHOSPHATIDYLINOSITOL_SIGNALING_SYSTEM	no
KEGG_MELANOMA	-0.00621193	-0.0863671	-0.306477	0.759368	0.840729	-6.90197	KEGG_MELANOMA	no
KEGG_CHRONIC_MYELOID_LEUKEMIA	-0.00885993	-0.0616656	-0.297969	0.76585	0.842888	-6.90452	KEGG_CHRONIC_MYELOID_LEUKEMIA	no
KEGG_NON_SMALL_CELL_LUNG_CANCER	0.00627338	-0.146569	0.260731	0.794406	0.869174	-6.91485	KEGG_NON_SMALL_CELL_LUNG_CANCER	no
KEGG_O_GLYCAN_BIOSYNTHESIS	0.00607476	-0.0923315	0.250364	0.802408	0.872795	-6.91748	KEGG_O_GLYCAN_BIOSYNTHESIS	no
KEGG_TIGHT_JUNCTION	0.00475073	-0.149142	0.235477	0.813934	0.880185	-6.92107	KEGG_TIGHT_JUNCTION	no
KEGG_PANCREATIC_CANCER	-0.00609925	-0.0507536	-0.21627	0.828865	0.891149	-6.92537	KEGG_PANCREATIC_CANCER	no
KEGG_OLFACTORY_TRANSDUCTION	0.00126615	-0.158895	0.163417	0.870256	0.930273	-6.93534	KEGG_OLFACTORY_TRANSDUCTION	no
KEGG_OOCYTE_MEIOSIS	0.00333196	-0.0791617	0.139799	0.888875	0.934858	-6.93889	KEGG_OOCYTE_MEIOSIS	no
KEGG_PROGESTERONE_MEDIATED_OOCYTE_MATURATION	0.00322989	-0.0840407	0.139691	0.88896	0.934858	-6.93891	KEGG_PROGESTERONE_MEDIATED_OOCYTE_MATURATION	no
KEGG_AMINO_SUGAR_AND_NUCLEOTIDE_SUGAR_METABOLISM	0.00358052	-0.0727667	0.135662	0.892143	0.934858	-6.93946	KEGG_AMINO_SUGAR_AND_NUCLEOTIDE_SUGAR_METABOLISM	no
KEGG_ALZHEIMERS_DISEASE	0.00277078	-0.176432	0.129349	0.897133	0.934858	-6.94029	KEGG_ALZHEIMERS_DISEASE	no
KEGG_COLORECTAL_CANCER	0.00367733	-0.037006	0.126135	0.899675	0.934858	-6.9407	KEGG_COLORECTAL_CANCER	no
KEGG_CARDIAC_MUSCLE_CONTRACTION	0.00236472	-0.0768095	0.116034	0.907672	0.935778	-6.94191	KEGG_CARDIAC_MUSCLE_CONTRACTION	no
KEGG_GAP_JUNCTION	-0.00209367	-0.165755	-0.112309	0.910623	0.935778	-6.94233	KEGG_GAP_JUNCTION	no
KEGG_SMALL_CELL_LUNG_CANCER	0.00250669	-0.104558	0.0987592	0.921369	0.941619	-6.94375	KEGG_SMALL_CELL_LUNG_CANCER	no
KEGG_DRUG_METABOLISM_CYTOCHROME_P450	0.000945675	-0.12234	0.0706035	0.943741	0.959213	-6.94612	KEGG_DRUG_METABOLISM_CYTOCHROME_P450	no
KEGG_OTHER_GLYCAN_DEGRADATION	0.000863073	-0.399319	0.047314	0.962282	0.972741	-6.94748	KEGG_OTHER_GLYCAN_DEGRADATION	no
KEGG_GLYCEROLIPID_METABOLISM	-0.000605425	-0.186699	-0.0345947	0.972417	0.974648	-6.948	KEGG_GLYCEROLIPID_METABOLISM	no
KEGG_DORSO_VENTRAL_AXIS_FORMATION	0.000618628	-0.276473	0.031795	0.974648	0.974648	-6.94809	KEGG_DORSO_VENTRAL_AXIS_FORMATION	no
